# Supplementary material for: Solubility investigations in the amorphous calcium magnesium carbonate system
Source: Royal Society of Chemistry journal article supplement (doi:10.1039/c8ce01596a), 2018-11-20
Supplement: c8ce01596a1.pdf [file c8ce01596a1.pdf]

## Supplementary Information

**Table S1**

Chemical composition of experimental solutions and solids of solubility experiments. Sample: synthetic ACCM sample used for solubility experiments (see Table 1); Time: reaction time during the experimental run; pH: pH of the experimental solution; Alkalinity: alkalinity concentration of the experimental solution;  $[Ca]_{aq}$ ,  $[Mg]_{aq}$ ,  $[Na]_{aq}$ : measured Ca, Mg and Na concentration of the experimental solution;  $[Mg]_{ACMC}$ : Mg content of the ACCM solid;  $IAP_{ACMC}$ : ion activity product of the experimental solution calculated according to eq. 1.

| Sample  | Time<br>min | pH    | Alkalinity<br>mM | $[Ca]_{aq}$<br>mM | $[Mg]_{aq}$<br>mM | $[Na]_{aq}$<br>mM | $[Mg]_{ACMC}$<br>mol% |
|---------|-------------|-------|------------------|-------------------|-------------------|-------------------|-----------------------|
| ACC     | 0           | 8.30  | 104.2            | 0                 | 28.6              | 99.3              | 0                     |
|         | 0.2         | 8.37  | 106.1            | 4.6               | 24.9              | 96.8              | 1.8                   |
|         | 2.3         | 8.41  | 105.0            | 4.9               | 26.4              | 105.1             | 2.1                   |
|         | 4.4         | 8.40  | 105.7            | 4.8               | 25.9              | 103.8             | 2.1                   |
|         | 6.4         | 8.40  | 104.6            | 4.9               | 25.8              | 103.4             | 2.2                   |
|         | 8.7         | 8.40  | 105.4            | 4.6               | 25.0              | 99.4              | 2.3                   |
|         | 12.5        | 8.41  | 104.4            | 4.5               | 25.1              | 102.7             | 2.3                   |
| ACMC_9  | 0           | 8.32  | 103.6            | 0                 | 29.3              | 101.4             | 9.1                   |
|         | 0.2         | 8.47  | 105.6            | 3.9               | 27.8              | 100.7             | 10.4                  |
|         | 2.2         | 8.54  | 107.5            | 3.7               | 28.7              | 104.3             | 10.4                  |
|         | 4.6         | 8.54  | 106.8            | 3.7               | 28.0              | 103.3             | 10.4                  |
|         | 11.9        | 8.55  | 107.6            | 3.6               | 28.1              | 103.9             | 10.4                  |
|         | 16.1        | 8.56  | 106.1            | 3.7               | 28.3              | 103.8             | 10.6                  |
|         | 22.3        | 8.57  | 107.1            | 3.5               | 27.7              | 104.1             | 10.6                  |
| ACMC_15 | 0           | 8.40  | 103.5            | 0                 | 30.2              | 103.6             | 14.9                  |
|         | 0.2         | 8.64  | 112.3            | 4.0               | 30.6              | 102.0             | 15.7                  |
|         | 1.7         | 8.66  | 111.2            | 3.5               | 30.7              | 101.6             | 15.7                  |
|         | 4.1         | 8.66  | 111.7            | 3.3               | 30.3              | 102.3             | 15.8                  |
|         | 6.3         | 8.66  | 110.8            | 3.3               | 30.9              | 104.2             | 15.5                  |
|         | 9.8         | 8.67  | 108.9            | 3.2               | 30.7              | 104.2             | 15.7                  |
|         | 14.0        | 8.67  | 108.8            | 3.1               | 30.3              | 101.4             | 15.8                  |
|         | 21.2        | 8.67  | 108.8            | 3.0               | 29.8              | 101.9             | 16.0                  |
|         | 28.4        | 8.68  | 108.8            | 3.0               | 30.1              | 102.7             | 16.0                  |
| 35.7    | 8.69        | 109.8 | 3.1              | 30.4              | 103.6             | 15.9              |                       |
| ACMC_22 | 0           | 8.33  | 103.3            | 0.0               | 25.6              | 99.0              | 21.9                  |
|         | 0.2         | 8.60  | 140.9            | 2.5               | 31.0              | -                 | 21.5                  |
|         | 4.6         | 8.66  | 115.9            | 2.9               | 32.0              | 98.4              | 21.2                  |
|         | 7.8         | 8.67  | 115.9            | 2.9               | 30.8              | 97.8              | 20.8                  |
|         | 12.1        | 8.68  | 116.5            | 2.7               | 31.1              | 98.5              | 21.0                  |
|         | 17.9        | 8.69  | 115.0            | 2.9               | 32.7              | 98.1              | 21.9                  |
|         | 27.5        | 8.70  | 116.3            | 2.6               | 30.4              | 97.4              | 21.3                  |
| 44.7    | 8.71        | 115.3 | 2.7              | 32.3              | 103.7             | 21.2              |                       |
| ACMC_31 | 0.0         | 8.32  | 104.8            | 0                 | 27.0              | 106.7             | 30.8                  |
|         | 0.2         | 8.43  | 124.5            | 2.5               | 35.9              | 106.5             | 29.4                  |
|         | 2.0         | 8.89  | 126.9            | 2.5               | 36.0              | 103.0             | 30.4                  |
|         | 4.0         | 8.91  | 128.1            | 2.0               | 34.2              | 101.3             | 29.0                  |
|         | 6.1         | 8.92  | 124.9            | 2.1               | 36.2              | 104.9             | 28.2                  |
|         | 8.8         | 8.92  | 128.4            | 2.2               | 37.3              | 105.6             | 29.2                  |
|         | 11.9        | 8.93  | 128.4            | 2.3               | 40.1              | 102.1             | 30.6                  |
|         | 14.2        | 8.94  | 129.8            | 2.5               | 39.4              | 103.8             | 29.3                  |
|         | 18.6        | 8.94  | 125.3            | 2.5               | 40.4              | 106.6             | 28.9                  |

|         |      |      |       |     |       |       |      |
|---------|------|------|-------|-----|-------|-------|------|
|         | 35.7 | 8.95 | 124.5 | 2.1 | 38.7  | 102.5 | 28.9 |
| ACMC_39 | 0    | 8.32 | 104.7 | 0   | 28.8  | 101.5 | 39.4 |
|         | 0.2  | 8.87 | 125.1 | 2.3 | 39.1  | 101.9 | 38.2 |
|         | 5.2  | 9.01 | 133.6 | 2.0 | 40.8  | 102.2 | 37.2 |
|         | 8.2  | 9.02 | 133.7 | 1.8 | 39.9  | 102.2 | 37.4 |
|         | 11.3 | 9.02 | 132.8 | 1.8 | 35.5  | 102.7 | 37.7 |
|         | 14.9 | 9.02 | 132.9 | 1.7 | 35.2  | 102.7 | 37.2 |
|         | 19.1 | 9.02 | 131.8 | 1.7 | 36.4  | 101.7 | 37.7 |
|         | 39.1 | 9.02 | 133.2 | 1.8 | 37.6  | 102.0 | 37.1 |
| ACMC_53 | 0    | 8.32 | 103.1 | 0   | 30.7  | 102.9 | 53.4 |
|         | 0.2  | 8.95 | 140.5 | 2.1 | 47.3  | 104.7 | 51.8 |
|         | 1.7  | 9.11 | 141.7 | 1.6 | 47.9  | 101.5 | 51.2 |
|         | 3.9  | 9.14 | 143.3 | 1.6 | 49.4  | 103.7 | 51.2 |
|         | 5.7  | 9.14 | 143.8 | 1.6 | 49.9  | 104.6 | 51.4 |
|         | 10.4 | 9.15 | 143.9 | 1.5 | 49.1  | 103.7 | 50.9 |
|         | 13.5 | 9.16 | 144.1 | 1.5 | 48.5  | 101.8 | 50.4 |
|         | 18.6 | 9.16 | 143.3 | 1.5 | 48.5  | 103.5 | 51.6 |
| ACMC_80 | 0.0  | 8.33 | 104.0 | 0.0 | 28.3  | 100.9 | 79.5 |
|         | 0.2  | 9.01 | 154.7 | 1.4 | 48.6  | 98.4  | 78.6 |
|         | 1.8  | 9.23 | 159.4 | 1.0 | 51.5  | 99.8  | 78.3 |
|         | 3.9  | 9.25 | 162.0 | 0.9 | 52.2  | 100.5 | 78.5 |
|         | 5.7  | 9.26 | 160.6 | 0.8 | 52.1  | 100.2 | 78.4 |
|         | 7.8  | 9.27 | 161.4 | 0.8 | 51.8  | 100.1 | 78.8 |
| AMC     | 0    | 8.33 | 103.1 | 0   | 28.5  | 102.7 | 100  |
|         | 0.2  | 9.31 | 189.4 | 0   | 67.78 | 102.3 | 100  |
|         | 1.9  | 9.39 | 181.4 | 0   | 61.6  | 100.1 | 100  |
|         | 3.8  | 9.39 | 175.7 | 0   | 59.8  | 102.4 | 100  |

**Table S2**

Input data for Phreeqc calculations and selected output data of experimental solutions at chemical steady state conditions (> 2 min). Sample: synthetic ACMC sample used for solubility experiments (see Table 1); Time: reaction time during the experimental run; Alkalinity: alkalinity concentration;  $[Ca]_{aq}$ ,  $[Mg]_{aq}$ ,  $[Na]_{aq}$ : measured Ca, Mg and Na concentration;  $[Cl]_{aq}$ : Cl concentration given by the  $MgCl_2$  added in the initial experimental solution ( $[Cl]_{aq} = 2 * \text{initial } [Mg]_{aq}$ ; see Table 1); I: ionic strength; charge: electrical charge balance; %Err: percentage error based on the charge imbalance ( $100 * (\text{Cat}-\text{An}) / (\text{Cat}+\text{An})$ );  $p_{CO_2(g)}$ : logarithm of internal  $CO_2$  partial pressure;  $\log(aCO_3^{2-})$ ,  $\log(aCa^{2+})$ ,  $\log(aMg^{2+})$ : activities of  $Ca^{2+}$ ,  $Mg^{2+}$  and  $CO_3^{2-}$  ions;  $[Mg]_{ACMC}$ : Mg content of the sampled ACMC solid;  $IAP_{ACMC}$ : ion activity product of the experimental solution calculated according to eq. 1.

| Sample         | Time<br>min | pH           | Alk.<br>mM   | $[Ca]_{aq}$<br>mM | $[Mg]_{aq}$<br>mM | $[Na]_{aq}$<br>mM | $[Cl]_{aq}$<br>mM | I            | charge   | %Err | $p_{CO_2(g)}$ | $\log(aCO_3^{2-})$ | $\log(aCa^{2+})$ | $\log(aMg^{2+})$ | $[Mg]_{ACMC}$<br>mol% | $\log(IAP_{ACMC})$ |
|----------------|-------------|--------------|--------------|-------------------|-------------------|-------------------|-------------------|--------------|----------|------|---------------|--------------------|------------------|------------------|-----------------------|--------------------|
| ACC            | 2.3         | 8.41         | 105.0        | 4.9               | 26.4              | 105.1             | 57.1              | 0.17         | 5.6E-03  | 1.9  | -1.81         | -3.14              | -3.07            | -2.24            | 2.1                   | -6.19              |
|                | 4.4         | 8.40         | 105.7        | 4.8               | 25.9              | 103.8             | 57.1              | 0.17         | 2.4E-03  | 0.8  | -1.79         | -3.14              | -3.08            | -2.24            | 2.1                   | -6.20              |
|                | 6.4         | 8.40         | 104.6        | 4.9               | 25.8              | 103.4             | 57.1              | 0.17         | 3.1E-03  | 1.1  | -1.80         | -3.15              | -3.07            | -2.24            | 2.2                   | -6.20              |
|                | 8.7         | 8.40         | 105.4        | 4.6               | 25.0              | 99.4              | 57.1              | 0.16         | -3.9E-03 | -1.4 | -1.79         | -3.14              | -3.09            | -2.26            | 2.3                   | -6.21              |
|                | 12.5        | 8.41         | 104.4        | 4.5               | 25.1              | 102.7             | 57.1              | 0.17         | 4.0E-04  | 0.1  | -1.81         | -3.14              | -3.10            | -2.26            | 2.3                   | -6.22              |
| <i>Average</i> | -           | <i>8.40</i>  | <i>105.0</i> | <i>4.7</i>        | <i>25.6</i>       | <i>102.9</i>      | <i>57.1</i>       | <i>0.17</i>  | -        | -    | <i>-1.80</i>  | <i>-3.14</i>       | <i>-3.08</i>     | <i>-2.25</i>     | <i>2.2</i>            | <i>-6.20</i>       |
| <i>±2δ</i>     | -           | <i>±0.01</i> | <i>±1.1</i>  | <i>±0.04</i>      | <i>±1.2</i>       | <i>±4.3</i>       | -                 | <i>±0.01</i> | -        | -    | <i>±0.02</i>  | <i>±0.01</i>       | <i>±0.03</i>     | <i>±0.02</i>     | <i>±0.2</i>           | <i>±0.02</i>       |
| ACMC_9         | 2.2         | 8.54         | 107.5        | 3.7               | 28.7              | 104.3             | 58.6              | 0.17         | 3.0E-03  | 1.0  | -1.95         | -3.02              | -3.21            | -2.22            | 10.4                  | -6.13              |
|                | 4.6         | 8.54         | 106.8        | 3.7               | 28.0              | 103.3             | 58.6              | 0.17         | 1.3E-03  | 0.4  | -1.95         | -3.02              | -3.21            | -2.23            | 10.4                  | -6.13              |
|                | 11.9        | 8.55         | 107.6        | 3.6               | 28.1              | 103.9             | 58.6              | 0.17         | 1.1E-03  | 0.4  | -1.96         | -3.01              | -3.23            | -2.23            | 10.4                  | -6.14              |
|                | 16.1        | 8.56         | 106.1        | 3.7               | 28.3              | 103.8             | 58.6              | 0.17         | 3.1E-03  | 1.1  | -1.98         | -3.01              | -3.21            | -2.22            | 10.6                  | -6.11              |
|                | 22.3        | 8.57         | 107.1        | 3.5               | 27.7              | 104.1             | 58.6              | 0.17         | 8.0E-04  | 0.3  | -1.99         | -2.99              | -3.24            | -2.23            | 10.6                  | -6.12              |
| <i>Average</i> | -           | <i>8.55</i>  | <i>107.0</i> | <i>3.6</i>        | <i>28.2</i>       | <i>103.9</i>      | <i>58.6</i>       | <i>0.17</i>  | -        | -    | <i>-1.97</i>  | <i>-3.01</i>       | <i>-3.22</i>     | <i>-2.23</i>     | <i>10.5</i>           | <i>-6.13</i>       |
| <i>±2δ</i>     | -           | <i>±0.03</i> | <i>±1.2</i>  | <i>±0.2</i>       | <i>±0.7</i>       | <i>±0.8</i>       | -                 | -            | -        | -    | <i>±0.04</i>  | <i>±0.02</i>       | <i>±0.03</i>     | <i>±0.01</i>     | <i>±0.2</i>           | <i>±0.02</i>       |
| ACMC_15        | 1.7         | 8.66         | 111.2        | 3.5               | 30.7              | 101.6             | 60.3              | 0.17         | -1.5E-03 | -0.5 | -2.08         | -2.91              | -3.27            | -2.21            | 15.7                  | -6.01              |
|                | 4.1         | 8.66         | 111.7        | 3.3               | 30.3              | 102.3             | 60.3              | 0.17         | -2.5E-03 | -0.9 | -2.08         | -2.91              | -3.29            | -2.21            | 15.8                  | -6.03              |
|                | 6.3         | 8.66         | 110.8        | 3.3               | 30.9              | 104.2             | 60.3              | 0.17         | 1.5E-03  | 0.5  | -2.08         | -2.91              | -3.29            | -2.20            | 15.5                  | -6.03              |
|                | 9.8         | 8.67         | 108.9        | 3.2               | 30.7              | 104.2             | 60.3              | 0.17         | 2.8E-03  | 1.0  | -2.10         | -2.91              | -3.30            | -2.20            | 15.7                  | -6.04              |
|                | 14.0        | 8.67         | 108.8        | 3.1               | 30.3              | 101.4             | 60.3              | 0.17         | -9.0E-04 | -0.3 | -2.10         | -2.91              | -3.32            | -2.21            | 15.8                  | -6.06              |
|                | 21.2        | 8.67         | 108.8        | 3.0               | 29.8              | 101.9             | 60.3              | 0.17         | -1.6E-03 | -0.6 | -2.10         | -2.91              | -3.33            | -2.22            | 16.0                  | -6.06              |
|                | 28.4        | 8.68         | 108.8        | 3.0               | 30.1              | 102.7             | 60.3              | 0.17         | -2.0E-04 | -0.1 | -2.11         | -2.90              | -3.33            | -2.21            | 16.0                  | -6.05              |
|                | 35.7        | 8.69         | 109.8        | 3.1               | 30.4              | 102.4             | 60.3              | 0.17         | -7.0E-04 | -0.2 | -2.12         | -2.89              | -3.32            | -2.21            | 15.9                  | -6.03              |
| <i>Average</i> | -           | <i>8.67</i>  | <i>109.9</i> | <i>3.2</i>        | <i>30.4</i>       | <i>102.6</i>      | <i>60.30</i>      | <i>0.17</i>  | -        | -    | <i>-2.10</i>  | <i>-2.91</i>       | <i>-3.31</i>     | <i>-2.21</i>     | <i>15.8</i>           | <i>-6.04</i>       |
| <i>±2δ</i>     | -           | <i>±0.02</i> | <i>±2.4</i>  | <i>±0.3</i>       | <i>±0.7</i>       | <i>±2.2</i>       | -                 | -            | -        | -    | <i>±0.03</i>  | <i>±0.01</i>       | <i>±0.04</i>     | <i>±0.01</i>     | <i>±0.3</i>           | <i>±0.03</i>       |
| ACMC_22        | 4.6         | 8.66         | 115.9        | 2.9               | 32.0              | 98.4              | 51.2              | 0.17         | 1.1E-03  | 0.4  | -2.06         | -2.89              | -3.36            | -2.19            | 21.2                  | -6.00              |
|                | 7.8         | 8.67         | 115.9        | 2.9               | 30.8              | 97.8              | 51.2              | 0.16         | -1.9E-03 | -0.7 | -2.07         | -2.88              | -3.36            | -2.21            | 20.8                  | -6.00              |
|                | 12.1        | 8.68         | 116.5        | 2.7               | 31.1              | 98.5              | 51.2              | 0.17         | -1.6E-03 | -0.6 | -2.08         | -2.87              | -3.39            | -2.21            | 21.0                  | -6.01              |

|                |      |            |           |           |           |           |       |            |          |      |            |            |            |            |           |            |
|----------------|------|------------|-----------|-----------|-----------|-----------|-------|------------|----------|------|------------|------------|------------|------------|-----------|------------|
|                | 17.9 | 8.69       | 115.0     | 2.9       | 32.7      | 98.1      | 51.2  | 0.17       | 3.1E-03  | 1.1  | -2.10      | -2.87      | -3.36      | -2.19      | 21.9      | -5.97      |
|                | 27.5 | 8.70       | 116.3     | 2.6       | 30.4      | 97.4      | 51.2  | 0.16       | -4.1E-03 | -1.5 | -2.10      | -2.85      | -3.42      | -2.22      | 21.3      | -6.01      |
|                | 44.7 | 8.71       | 115.3     | 2.7       | 32.3      | 103.7     | 51.2  | 0.17       | 7.2E-03  | 2.5  | -2.13      | -2.85      | -3.40      | -2.20      | 21.2      | -6.00      |
| <i>Average</i> | -    | 8.69       | 115.8     | 2.8       | 31.6      | 99.0      | 51.2  | 0.17       | -        | -    | -2.09      | -2.87      | -3.38      | -2.20      | 21.2      | -6.00      |
| $\pm 2\delta$  | -    | $\pm 0.04$ | $\pm 1.1$ | $\pm 0.3$ | $\pm 1.8$ | $\pm 4.7$ | -     | $\pm 0.01$ | -        | -    | $\pm 0.05$ | $\pm 0.03$ | $\pm 0.05$ | $\pm 0.02$ | $\pm 0.7$ | $\pm 0.03$ |
| ACMC_31        | 2.0  | 8.89       | 126.9     | 2.5       | 36.0      | 103.0     | 54.0  | 0.17       | 1.0E-03  | 0.3  | -2.32      | -2.69      | -3.49      | -2.19      | 30.4      | -5.79      |
|                | 4.0  | 8.91       | 128.1     | 2.0       | 34.2      | 101.3     | 54.0  | 0.17       | -4.1E-03 | -1.4 | -2.33      | -2.66      | -3.60      | -2.22      | 29.0      | -5.86      |
|                | 6.1  | 8.92       | 124.9     | 2.1       | 36.2      | 104.9     | 54.0  | 0.17       | -2.2E-04 | -0.1 | -2.36      | -2.67      | -3.57      | -2.19      | 28.2      | -5.85      |
|                | 8.8  | 8.92       | 128.4     | 2.2       | 37.3      | 105.6     | 54.0  | 0.17       | 3.8E-04  | 0.1  | -2.35      | -2.66      | -3.56      | -2.18      | 29.2      | -5.82      |
|                | 11.9 | 8.93       | 128.4     | 2.3       | 40.1      | 102.1     | 54.0  | 0.18       | 9.1E-03  | 3.1  | -2.38      | -2.67      | -3.53      | -2.15      | 30.6      | -5.78      |
|                | 14.2 | 8.94       | 129.8     | 2.5       | 39.4      | 103.8     | 54.0  | 0.17       | 2.5E-03  | 0.9  | -2.38      | -2.65      | -3.50      | -2.16      | 29.3      | -5.76      |
|                | 18.6 | 8.94       | 125.3     | 2.5       | 40.4      | 106.6     | 54.0  | 0.17       | 9.6E-03  | 3.3  | -2.40      | -2.67      | -3.49      | -2.14      | 28.9      | -5.77      |
|                | 35.7 | 8.96       | 124.5     | 2.1       | 38.7      | 102.5     | 54.0  | 0.17       | 2.2E-03  | 0.8  | -2.42      | -2.65      | -3.57      | -2.17      | 28.9      | -5.82      |
| <i>Average</i> | -    | 8.93       | 127.0     | 2.3       | 37.8      | 103.7     | 54    | 0.17       | -        | -    | -2.37      | -2.67      | -3.54      | -2.18      | 29.3      | -5.81      |
| $\pm 2\delta$  | -    | $\pm 0.04$ | $\pm 3.9$ | $\pm 0.4$ | $\pm 4.4$ | $\pm 3.7$ | -     | $\pm 0.01$ | -        | -    | $\pm 0.07$ | $\pm 0.03$ | $\pm 0.08$ | $\pm 0.05$ | $\pm 1.6$ | $\pm 0.07$ |
| ACMC_39        | 5.2  | 9.01       | 133.6     | 2.0       | 40.8      | 102.2     | 57.6  | 0.18       | -3.4E-03 | -1.2 | -2.47      | -2.59      | -3.63      | -2.17      | 37.2      | -5.68      |
|                | 8.2  | 9.02       | 133.7     | 1.8       | 39.9      | 102.2     | 57.6  | 0.18       | -5.7E-03 | -2.0 | -2.47      | -2.58      | -3.68      | -2.18      | 37.4      | -5.70      |
|                | 11.3 | 9.02       | 132.8     | 1.8       | 35.5      | 102.7     | 57.6  | 0.17       | -1.3E-02 | -4.5 | -2.46      | -2.57      | -3.68      | -2.24      | 37.7      | -5.71      |
|                | 14.9 | 9.02       | 132.9     | 1.7       | 35.2      | 102.7     | 57.6  | 0.17       | -1.4E-02 | -4.8 | -2.46      | -2.57      | -3.71      | -2.24      | 37.2      | -5.73      |
|                | 19.1 | 9.02       | 131.8     | 1.7       | 36.4      | 101.7     | 57.6  | 0.17       | -1.2E-02 | -4.0 | -2.47      | -2.58      | -3.70      | -2.22      | 37.7      | -5.72      |
|                | 39.1 | 9.02       | 133.2     | 1.8       | 37.6      | 102.0     | 57.6  | 0.17       | -1.0E-02 | -3.4 | -2.47      | -2.58      | -3.68      | -2.21      | 37.1      | -5.72      |
| <i>Average</i> | -    | 9.02       | 133.0     | 1.8       | 37.6      | 102.3     | 57.6  | 0.17       | -        | -    | -2.47      | -2.58      | -3.68      | -2.21      | 37.4      | -5.71      |
| $\pm 2\delta$  | -    | $\pm 0.01$ | $\pm 1.4$ | $\pm 0.2$ | $\pm 4.7$ | $\pm 0.8$ | -     | $\pm 0.01$ | -        | -    | 0.01       | 0.02       | 0.06       | 0.06       | $\pm 0.5$ | $\pm 0.04$ |
| ACMC_53        | 1.7  | 9.11       | 141.7     | 1.6       | 47.9      | 101.5     | 61.3  | 0.18       | -2.5E-03 | -0.8 | -2.60      | -2.53      | -3.75      | -2.12      | 51.2      | -5.44      |
|                | 3.9  | 9.14       | 143.3     | 1.6       | 49.4      | 103.7     | 61.3  | 0.19       | 1.1E-03  | 0.4  | -2.64      | -2.51      | -3.76      | -2.11      | 51.2      | -5.43      |
|                | 5.7  | 9.14       | 143.8     | 1.6       | 49.9      | 104.6     | 61.3  | 0.19       | 2.5E-03  | 0.8  | -2.64      | -2.51      | -3.76      | -2.11      | 51.4      | -5.42      |
|                | 10.4 | 9.15       | 144.3     | 1.5       | 49.5      | 103.7     | 61.3  | 0.19       | 1.0E-04  | 0.0  | -2.65      | -2.50      | -3.80      | -2.12      | 51.7      | -5.43      |
|                | 13.5 | 9.15       | 143.9     | 1.5       | 49.1      | 101.8     | 61.3  | 0.18       | -2.2E-03 | -0.7 | -2.65      | -2.50      | -3.80      | -2.12      | 50.9      | -5.45      |
|                | 18.6 | 9.16       | 143.3     | 1.5       | 48.5      | 103.5     | 61.3  | 0.18       | -1.1E-03 | -0.4 | -2.66      | -2.49      | -3.80      | -2.13      | 51.6      | -5.43      |
| <i>Average</i> | -    | 9.14       | 143.4     | 1.6       | 49.1      | 103.1     | 61.30 | 0.19       | -        | -    | -2.64      | -2.51      | -3.78      | -2.12      | 51.3      | -5.43      |
| $\pm 2\delta$  | -    | $\pm 0.03$ | $\pm 1.8$ | $\pm 0.1$ | $\pm 1.5$ | $\pm 2.4$ | -     | $\pm 0.01$ | -        | -    | $\pm 0.04$ | $\pm 0.03$ | $\pm 0.05$ | $\pm 0.01$ | $\pm 0.6$ | $\pm 0.02$ |
| ACMC_80        | 1.8  | 9.23       | 159.4     | 1.0       | 51.5      | 99.8      | 56.5  | 0.18       | -1.1E-02 | -3.7 | -2.72      | -2.41      | -4.03      | -2.14      | 78.3      | -4.96      |
|                | 3.9  | 9.25       | 162.0     | 0.9       | 52.2      | 100.5     | 56.5  | 0.18       | -1.2E-02 | -4.1 | -2.74      | -2.39      | -4.08      | -2.14      | 78.5      | -4.95      |
|                | 5.7  | 9.26       | 160.6     | 0.8       | 52.1      | 100.2     | 56.5  | 0.18       | -1.1E-02 | -3.8 | -2.76      | -2.39      | -4.13      | -2.14      | 78.4      | -4.96      |
|                | 7.8  | 9.27       | 161.4     | 0.8       | 51.8      | 100.1     | 56.5  | 0.18       | -1.3E-02 | -4.3 | -2.77      | -2.38      | -4.14      | -2.15      | 78.8      | -4.95      |
| <i>Average</i> | -    | 9.25       | 160.9     | 0.9       | 51.9      | 100.2     | 56.50 | 0.18       | -        | -    | -2.75      | -2.39      | -4.10      | -2.14      | 78.5      | -4.96      |
| $\pm 2\delta$  | -    | $\pm 0.03$ | $\pm 2.3$ | $\pm 0.2$ | $\pm 0.6$ | $\pm 0.6$ | -     | -          | -        | -    | $\pm 0.04$ | $\pm 0.03$ | $\pm 0.10$ | $\pm 0.01$ | $\pm 0.4$ | $\pm 0.01$ |
| AMC            | 1.9  | 9.39       | 181.4     | 0         | 61.6      | 100.1     | 57.0  | 0.19       | -1.5E-02 | -5.0 | -2.92      | -2.29      | -          | -2.12      | 100       | -4.41      |
|                | 3.8  | 9.39       | 175.7     | 0         | 59.8      | 102.4     | 57.0  | 0.19       | -1.1E-02 | -3.6 | -2.93      | -2.30      | -          | -2.12      | 100       | -4.42      |
| <i>Average</i> | -    | 9.39       | 178.6     | -         | 60.7      | 101.3     | 57.00 | 0.19       | -        | -    | -2.93      | -2.30      | -          | -2.12      | 100       | -4.42      |

---

|               |   |   |           |   |           |           |   |   |   |   |            |            |   |   |   |            |
|---------------|---|---|-----------|---|-----------|-----------|---|---|---|---|------------|------------|---|---|---|------------|
| $\pm 2\delta$ | - | - | $\pm 8.1$ | - | $\pm 2.6$ | $\pm 3.3$ | - | - | - | - | $\pm 0.01$ | $\pm 0.01$ | - | - | - | $\pm 0.01$ |
|---------------|---|---|-----------|---|-----------|-----------|---|---|---|---|------------|------------|---|---|---|------------|

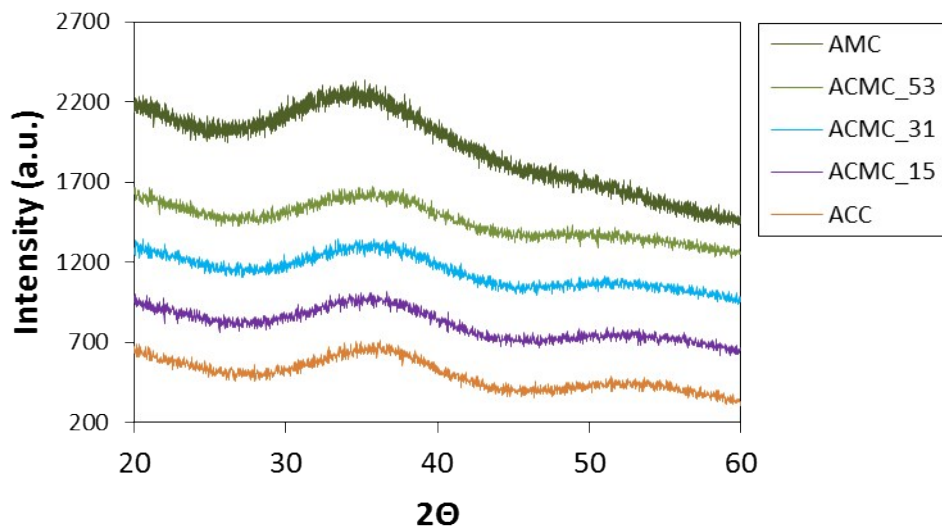

**Figure S1:** X-ray diffraction patterns of representative synthetic ACMC samples (see Table 1).

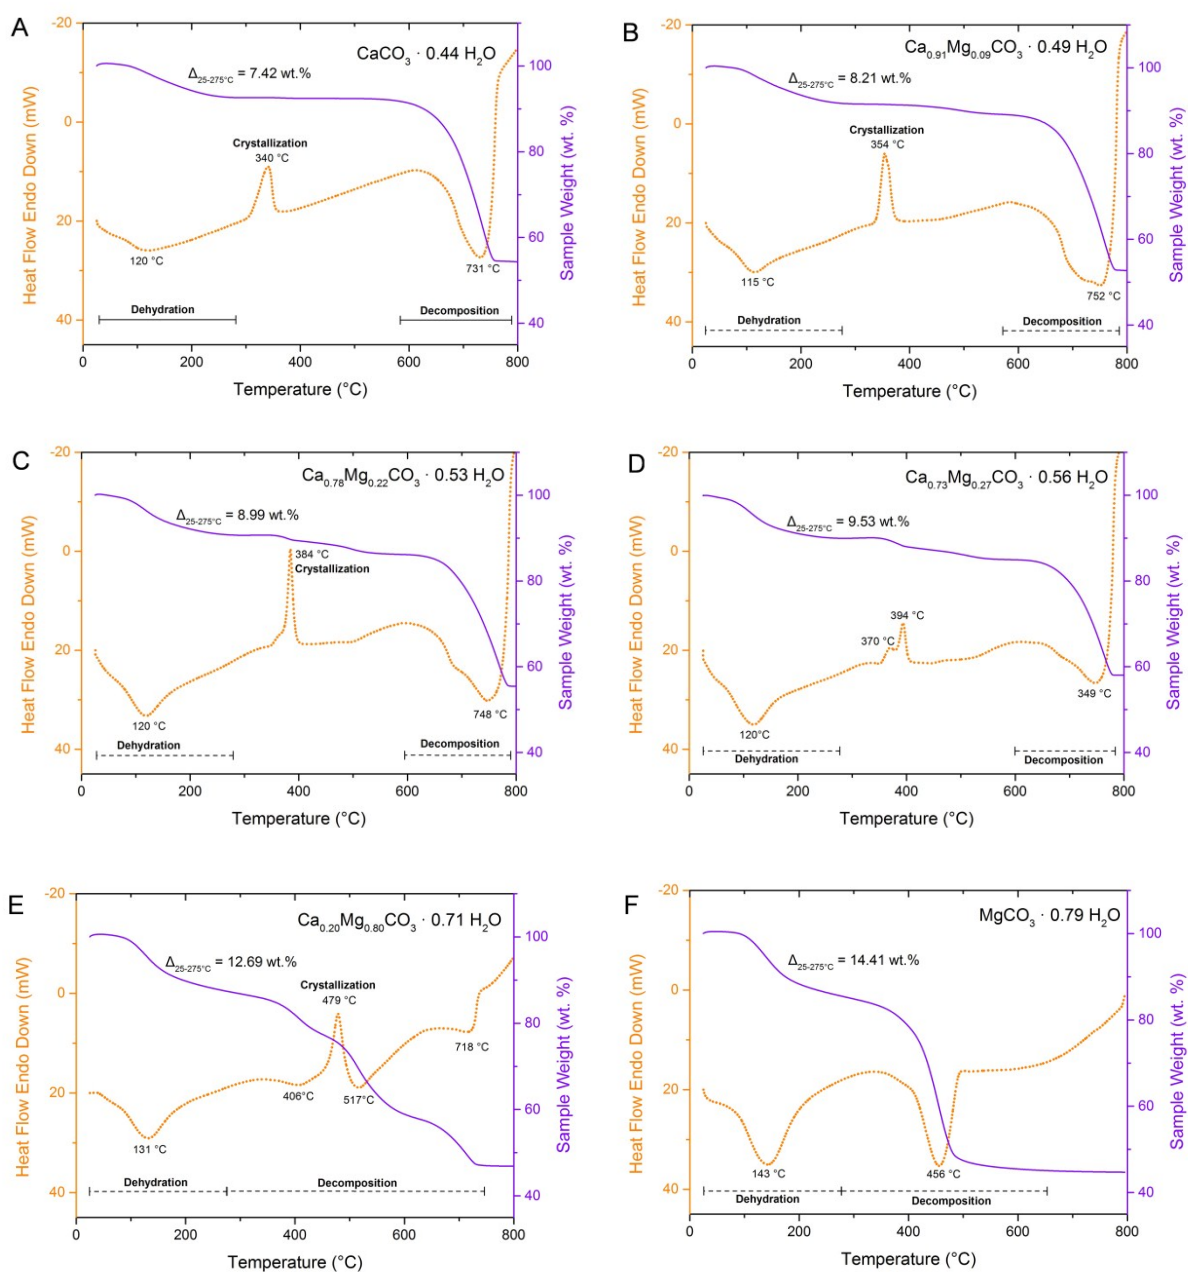

**Figure S2:** Thermogravimetric analysis (TGA – orange solid lines) and differential scanning calorimetry (DSC – violet dashed lines) curves of ACC (A), ACMC\_9 (B), ACMC\_22 (C), ACMC\_53(D), ACMC\_80 (E) and AMC (H) synthesized in the context of the present study (see Table 1).

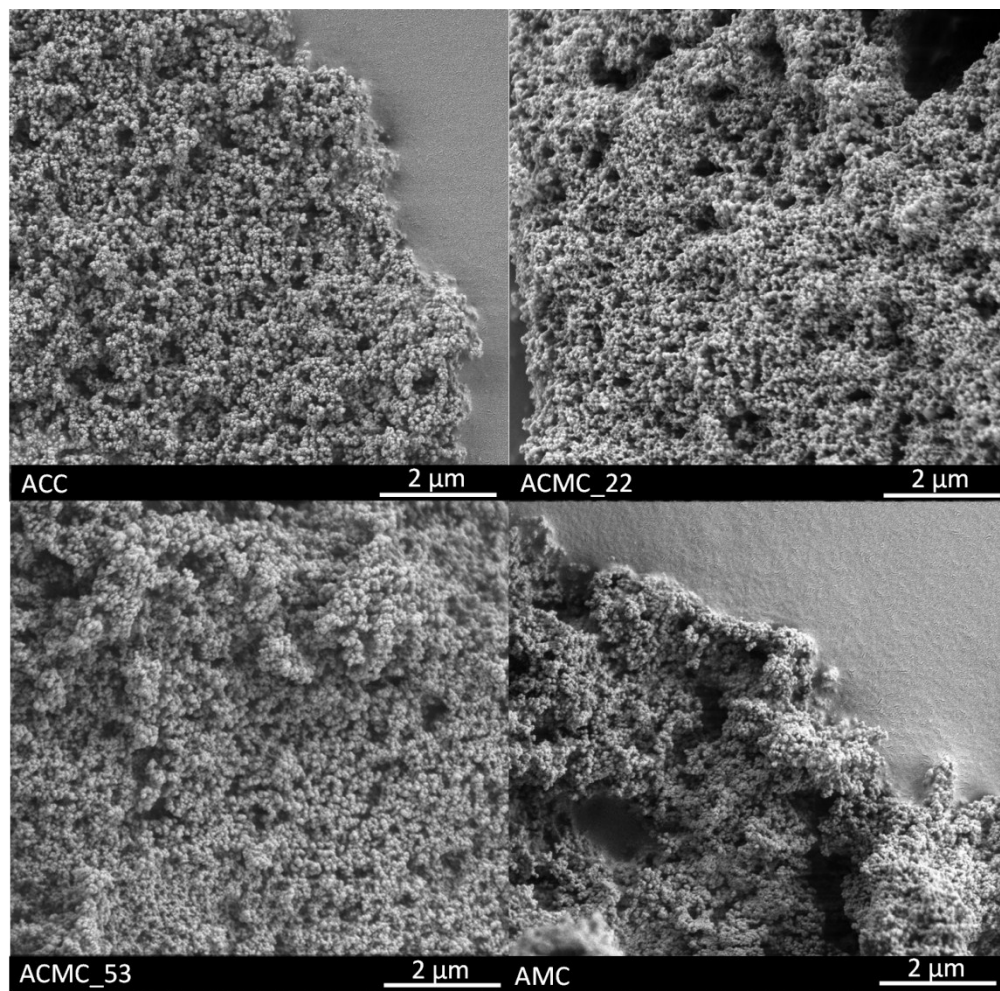

**Figure S3:** Scanning Electron Microscopy (SEM) images of representative ACMC samples (see Table 1).



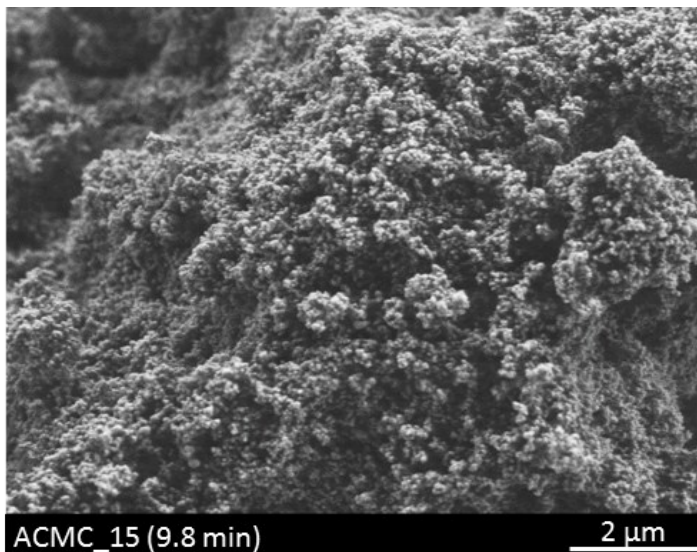

**Figure S4:** Scanning Electron Microscopy (SEM) image of ACMC collected after 9.8 min of reaction time in the experiment conducted with 15 mol% Mg (ACMC\_15).
